# Supplementary material for: Co-Treatment with Human Leukocyte Extract and Albendazole Stimulates Drug’s Efficacy and Th1 Biased Immune Response in Mesocestoides vogae (Cestoda) Infection via Modulation of Transcription Factors, Macrophage Polarization, and Cytokine Profiles
Source: MDPI journal article supplement (doi:10.3390/pharmaceutics15020541), 2023-02-06
Supplement: s1 [file s1]

Supplementary Materials

# Co-Treatment with Human Leukocyte Extract and Albendazole Stimulates Drug's Efficacy and Th1 Biased Immune Response in *Mesocostoides vogae* (Cestoda) Infection via Modulation of Transcription Factors, Macrophage Polarization, and Cytokine Profiles

**Table S1.** List of oligonucleotides and their sequences used in RT-PCR reactions.

| Gene           | Orientation | Sequence                                      |
|----------------|-------------|-----------------------------------------------|
| β-actin        | forward     | 5'-ACCAACTGGGACGACATGGAGAAAATC-3'             |
|                | reverse     | 5'-GTAGCCGCGCTCGGTGAGGATCTTCAT-3'             |
| IL-6           | forward     | 5'-ATGAAGTTCCTCTCTGCAAGAGACT                  |
|                | reverse     | 5'-CACTAGGTTTGCCGAGTAGATCTC                   |
| IL-12p40       | forward     | 5'-GGA AGC ACG GCA GCA GAT TA-3'              |
|                | reverse     | 5'-AAC TTG AGG GAG AAG TAG GAA TGG-3'         |
| IFN-γ          | forward     | 5'-TCA AGT GGC ATA GAT GTG GAA GAA -3'        |
|                | reverse     | 5'-TGG CTC TGC AGG ATT TTC ATG-3'             |
| TNF-α          | forward     | 5'-GGCAGGTCTACTTTGGAGTCATTGC-3'               |
|                | reverse     | 5'-ACATTCGAGGCTCCAGTGAATTGGG-3'               |
| IL-4           | forward     | 5'-TCAACCCCCAGCTAGTTGTC-3'                    |
|                | reverse     | 5'-TTCAAGCATGGAGTTTCCC-3'                     |
| TGF-β          | forward     | 5'-TGACGTCACCTGGAGTTGTACGG-3'                 |
|                | reverse     | 5'-GGTTCATGTCATGGATGGTGC-3'                   |
| IL-10          | forward     | 5'-CCA AGC CTT ATC GGA AAT GA-3'              |
|                | reverse     | 5'-TTC TCA CCC AGG GAA TTC A-3'               |
| STAT1          | forward     | 5'-CTGAATATTTCCCTCCTGGG -3'                   |
|                | reverse     | 5'-TCCCGTACAGATGTCCATGAT -3'                  |
| IFN-γ receptor | forward     | 5'-CTC TGC TGT GCG GGT GTA-3'                 |
|                | reverse     | 5'-CCA CAC AGC TTC CTC TTG CT-3               |
| Arginase-1     | forward     | 5'-CAGAAGAATGGAAGAGTCAG -3'                   |
|                | reverse     | 5'-CAGATATGCAGGGAGTCACC -3'                   |
| FIZZ-1         | forward     | 5'-GGT CCC AGT GCA TAT GGA TGA GAC CAT AG-3'  |
|                | reverse     | 5'-CAC CTC TTC ACT CGA GGG ACA GTT GGC AGC-3' |
| Ym-1           | forward     | 5'-TCA CAG GTC TGG CAA TTC TTC TG-3'          |
|                | reverse     | 5'-TTT GTC CTT AGG AGG GCT TCC TC-3'          |
| iNOS           | forward     | 5'-GCCTCATGCCATTGAATTCATCAACC-3'              |
|                | reverse     | 5'-GAGCTGTGAATTCCAGAGCCTGAA-3'                |
| STAT3          | forward     | 5'-GAAGCCGACCCAGGTGC-3'                       |
|                | reverse     | 5'-GTCACGTCTCTGCAGCTTCT-3'                    |
| STAT6          | forward     | 5'-GAGTTCCTGGTCGGTTCAGA-3'                    |
|                | reverse     | 5'-GCTCTCCAAGGTGCTGATGT-3'                    |
| NFκB p65       | forward     | 5'-GACCAACAATAACCCCTTTCAC-3'                  |
|                | reverse     | 5'-GTTTGAGATCTGCCCTGATGG-3'                   |
